# Supplementary material for: Memory B Cell Activation, Broad Anti-influenza Antibodies, and Bystander Activation Revealed by Single-Cell Transcriptomics
Source: PubMed Central journal article supplement — Cell Rep. Author manuscript; Available in PMC 2021 Feb 18. (PMC7891556; doi:10.1016/j.celrep.2019.12.063), 2020-01-21
Supplement: NIHMS1668578-supplement-1.pdf [file NIHMS1668578-supplement-1.pdf]

Cell Reports, Volume 30

**Supplemental Information**

**Memory B Cell Activation, Broad Anti-influenza  
Antibodies, and Bystander Activation Revealed  
by Single-Cell Transcriptomics**

Felix Horns, Cornelia L. Dekker, and Stephen R. Quake

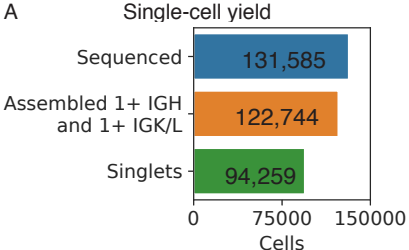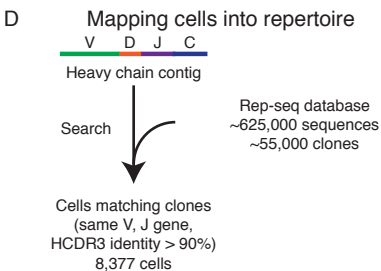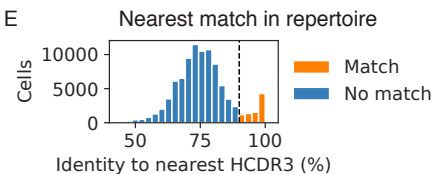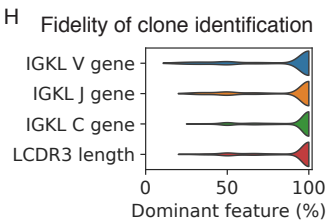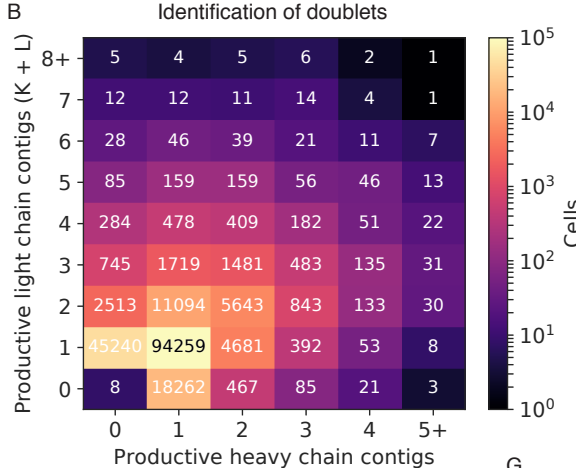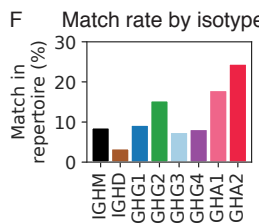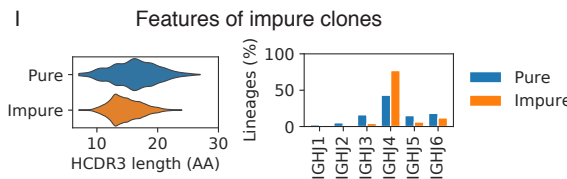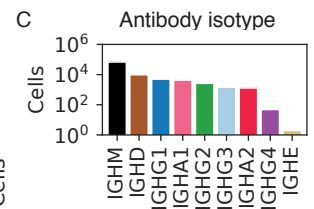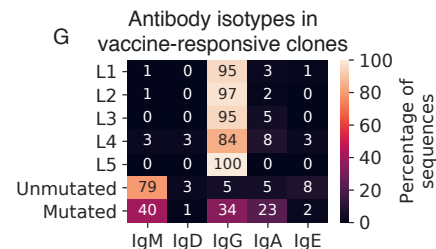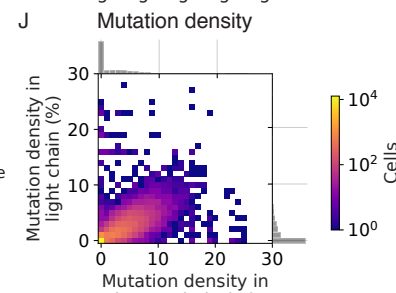

**Figure S1. Performance and features of integrated single-cell and antibody repertoire sequencing measurements, Related to Figure 2.**

- (A) Number of single cells that were sequenced, had at least one productive heavy (IGH) and one light (IGK/L) chain gene assembled, or had exactly one productive heavy and one productive light chain gene assembled (singlets).
- (B) Doublets were identified and removed based on the number of productive heavy and light chain contigs assembled. Heatmap shows the number of putative cells (cell barcodes) having the number of productive heavy and light chain (either kappa or lambda) contigs indicated by the x- and y-axis, respectively.
- (C) Isotypes of antibodies from single B cells, as determined based on the heavy chain constant region sequence.
- (D) Strategy for mapping single B cells to clones detected by repertoire sequencing using a custom search algorithm. Matches required usage of the same V and J genes and HCDR3 identity >90%.
- (E) HCDR3 identity of nearest match in repertoire sequences. Dashed line indicates cutoff of 90% HCDR3 identity used for identification of bona fide matches.
- (F) Isotypes of antibodies in the single cells that matched clones detected by repertoire sequencing (n = 8,377 cells)
- (G) Isotypes of antibodies in vaccine-responsive clones, or in the mutated (V gene identity to germline < 100%) or unmutated (V gene identity to germline = 100%) fractions of the repertoire.
- (H) Fidelity of clone identification was determined by assessing the fraction of single cells sharing the characteristics of the dominant light chain gene found within the clone.
- (I) Molecular features of pure and impure clones (as determined based on light chain characteristics).
- (J) Mutation density in the natively paired heavy and light chain genes of individual cells based on comparison with germline V gene. Marginal plots show univariate distributions of mutation density in each chain.
- AA, amino acids; HCDR3, heavy chain complementarity determining region 3; LCDR3, light chain complementarity determining region 3.

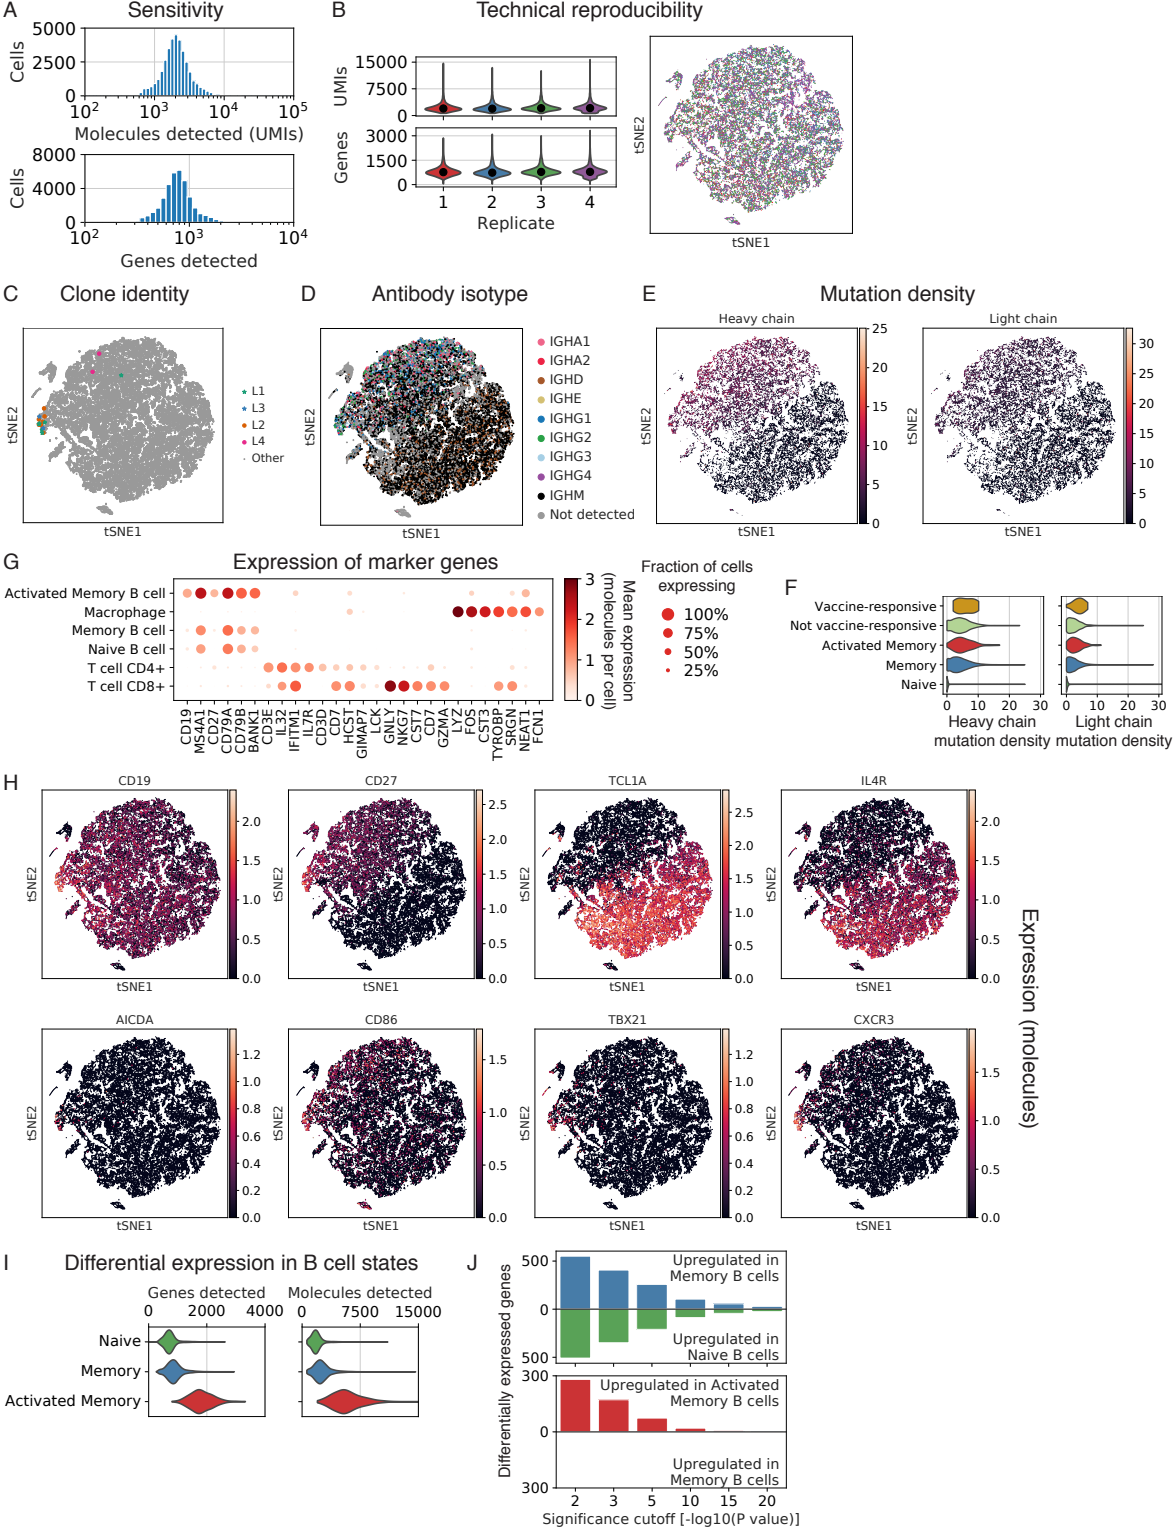

**Figure S2. Additional characterization of transcriptional profiles, clonal origins, and molecular features of antibodies in single cells isolated from peripheral blood after influenza vaccination, Related to Figure 3.**

(A) Genes and molecules detected in each individual cell. UMIs, unique molecular identifiers.

(B) Reproducibility in technical replicates. Left panel shows distributions of genes and molecules detected in individual cells in different technical replicates. Median is indicated by black dot. Right panel shows the transcriptome profiles of individual cells, visualized using principal components analysis (PCA) and t-distributed Stochastic Neighbor Embedding (tSNE) as in Figure 3. Each dot is a cell colored by technical replicate of origin, according to the colors in left plots.

(C–E) Clonal origin and molecular features of individual cells. Cells are visualized as in Figure 3 and colored by clone identity as revealed by Rep-seq (C), antibody isotype (D), or density of somatic mutations in the V gene in comparison with germline (E), as revealed by single-cell heavy chain assembly (D and E). In (C), vaccine-responsive clones that bind vaccine (L1 and L3) or do not bind vaccine (L2 and L4) are indicated by stars or circles, respectively. L5 is not shown because gene expression information was not obtained for any cells belonging to this clone.

(F) Density of somatic mutations in the V gene of the heavy chain (left) or light chain (right) in comparison to the germline for single cells annotated based on dynamics (vaccine-responsive or not vaccine-responsive) or gene expression profile (activated memory, memory, or naïve B cells).

(G) Expression of established marker genes in clusters. Clusters were manually annotated based on these expression profiles.

(H) Expression of selected established marker genes and genes of immunological interest in single cells. Cells are visualized as in Figure 3 and colored by expression of the gene indicated by the title of the plot.

(I) Distributions of genes and molecules detected in B cells in distinct states.

(J) Differential expression analysis identified genes upregulated in naïve compared to memory B cells (green), memory compared naïve B cells (blue), and activated memory compared to memory B cells (red) across a range of significance cutoffs.

# Features of vaccine-responsive antibody clones

| Clone | Antibodies produced | Antibodies sequenced | Abundance at D7 (%) | FC D0 to D7 | HV gene  | HJ gene | HCDR3 length (AA) | LV gene | LJ gene | LCDR3 length (AA) |
|-------|---------------------|----------------------|---------------------|-------------|----------|---------|-------------------|---------|---------|-------------------|
| L1    | 5                   | 48                   | 8.5                 | 4360        | V3-15*01 | J5*02   | 16                | LV6-57  | LJ2     | 12                |
| L2    | 5                   | 40                   | 6.7                 | ∞           | V4-59*08 | J4*02   | 17                | LV2-23  | LJ3     | 12                |
| L3    | 7                   | 7                    | 0.2                 | ∞           | V4-34*01 | J3*01   | 19                | KV1-39  | KJ3     | 5                 |
| L4    | 3                   | 3                    | 0.1                 | 62          | V1-3*01  | J6*03   | 20                | KV3-20  | KJ3     | 9                 |
| L5    | 1                   | 1                    | 0.1                 | ∞           | V4-59*08 | J4*02   | 19                | LV2-23  | LJ3     | 11                |

## B Binding to influenza vaccine

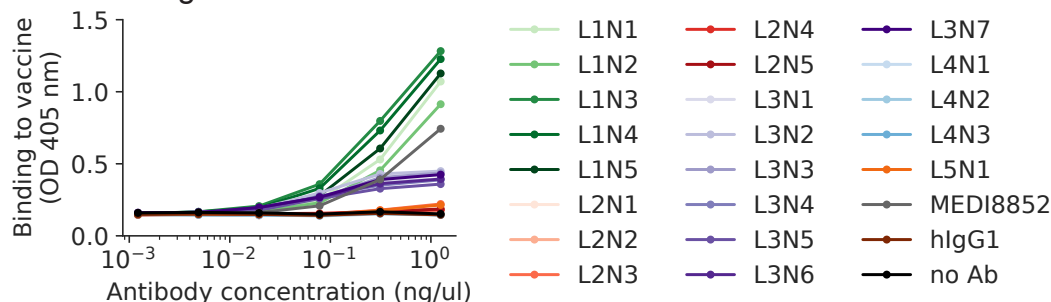

## C Binding to influenza proteins and common antigens

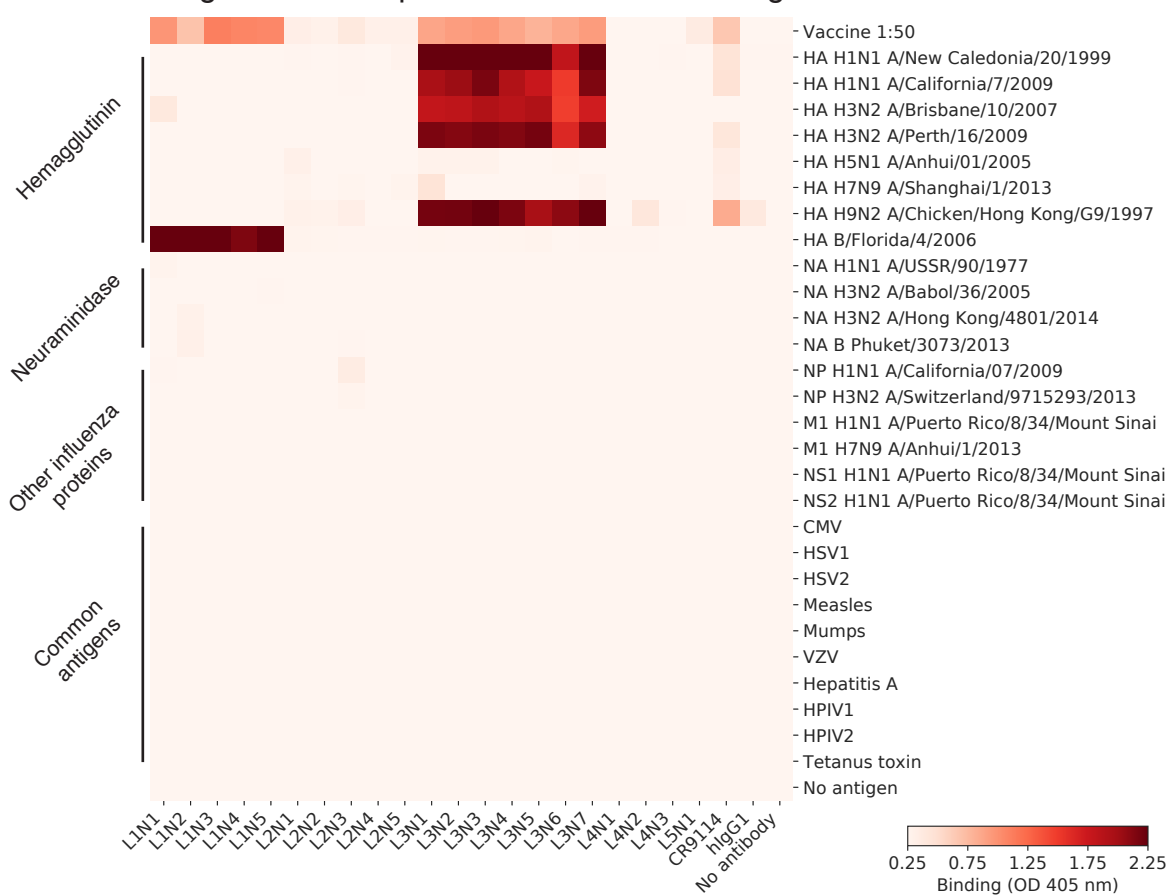

**Figure S3. Molecular features and functional characterization of influenza vaccine-responsive antibodies, Related to Figure 4.**

(A) Molecular features and population dynamics of vaccine-responsive antibody clones. “Antibodies sequenced” indicates the number of cells captured by droplet-based single-cell sequencing, and thus antibodies having native heavy and light chain sequences. FC, fold-change; D0, day 0 after vaccination; D7, day 7 after vaccination; AA, amino acids.

(B and C) Binding of vaccine-responsive antibodies to the vaccine given to the subject (trivalent inactivated influenza vaccine from the 2011–2012 flu season) (B) and to purified influenza proteins and common viral and bacterial antigens (C) was measured using enzyme-linked immunosorbent assay (ELISA).

HA, hemagglutinin; NA, neuraminidase; NP, nucleoprotein, M1, matrix protein 1; NS1, non-structural protein 1; NS2, non-structural protein 2; CMV, cytomegalovirus; HSV1/2, herpes simplex virus 1/2; VZV, varicella zoster virus; HPIV1/2, human parainfluenza virus 1/2; OD, optical density; hIgG1, human IgG1; no Ab, no antibody.





**Figure S4. Molecular features and functional characterization of a broadly binding anti-influenza antibody clone, Related to Figure 5.**

(A and B) Alignments of heavy (A) and light (B) chain variable region protein sequences for antibodies and engineered variants from clone L3. As in Figure 5, these antibodies include extant sequences (N1–7), reconstructed ancestral sequences (germline and A1–4), and engineered variants having the L3N6 sequences, but with heavy chain reverted to the inferred germline sequence (germline IGH), light chain reverted to the inferred germline sequence (germline IGK), or a light chain sequence substituted from a different clone (IGK swap). Germline genes were *HV4-34\*01*, *HJ3\*01*, *KV1-39*, and *KJ3*. CDRs are indicated by red boxes. Background color indicates conservation of the position. Residues that are the same as germline are indicated by “.”.

(C and D) Equilibrium constants ( $K_D$ ) (C) and kinetic constants ( $k_{on}$  and  $k_{off}$ ) (D) of binding between antibody variants from L3 and hemagglutinin variants were measured using biolayer interferometry. Symbols denoting variants are shown in Figure S4A.

(E) Kinetics of binding and unbinding of germline and engineered antibody variants to H1 (A/California/7/2009) (left) and H3 (A/Perth/16/2009) (right) hemagglutinin antigens. Colors indicate antibody variants and antigen concentration. Dashed line indicates transition from association to dissociation step. Note that determination of equilibrium binding constants (shown in Figure 5C) was performed at lower antigen concentrations (not shown here).

A

## Epitope mapping by cross-competition

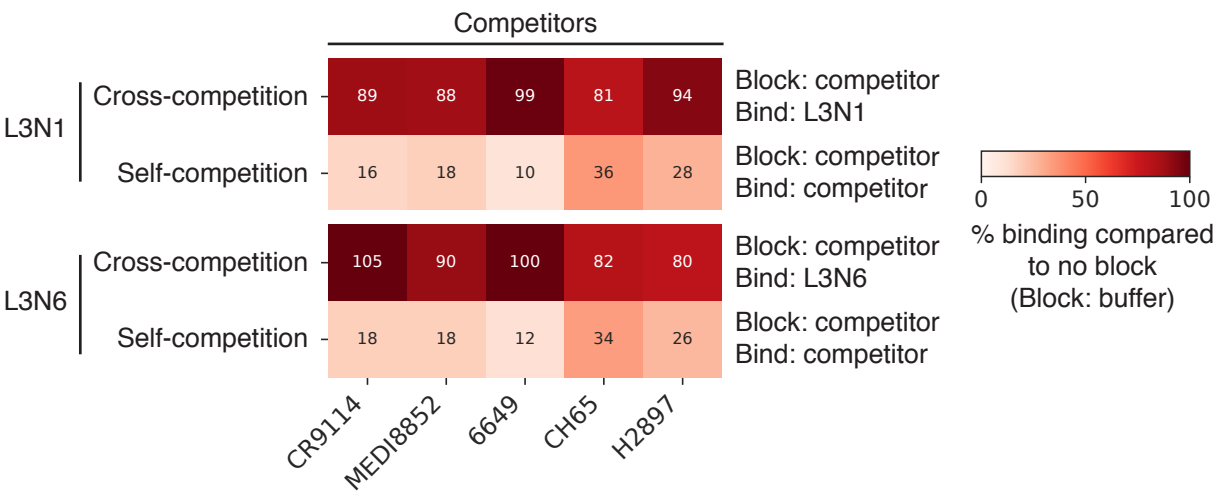

B

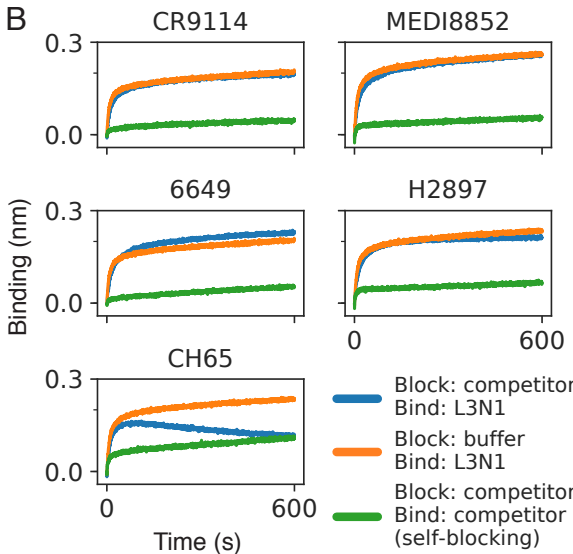

C

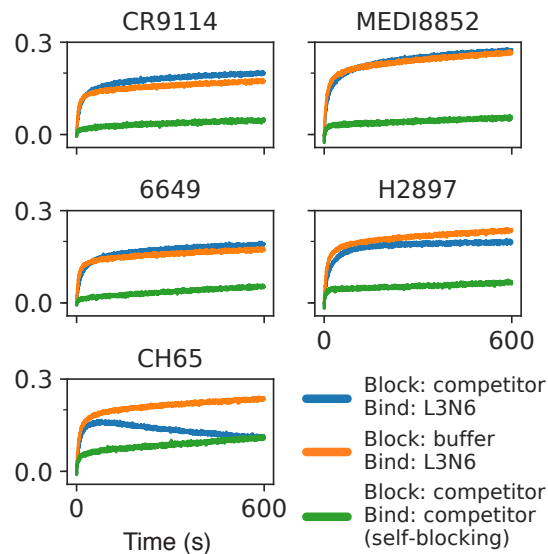

D

## Unbinding of competitors

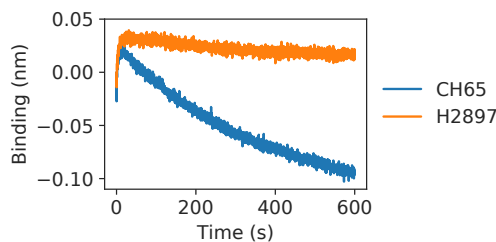

E

## Known competitors

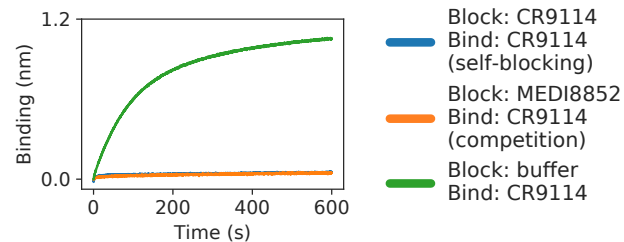

**Figure S5. Determination of antibody epitopes by cross-competition, Related to Figure 5.**

(A–C) Binding of antibodies L3N1 and L3N6 to trimeric hemagglutinin (H1 A/New Caledonia/20/1999) following blocking with potentially competing antibodies as determined by biolayer interferometry.

In (B) and (C), the kinetics of binding of L3N1 (B) and L3N6 (C) are shown, after blocking with the competitor indicated by the title of each subpanel. To summarize these data (A), binding was determined after 50 s and compared with binding observed in the absence of blocking (i.e., using buffer instead of a potentially competing antibody during the blocking step).

(D) Kinetics of unbinding for competitors CH65 and H2897. Fast unbinding of CH65 explains the observed decrease in binding in (B) and (C).

(E) Kinetics of binding of CR9114 to trimeric hemagglutinin (H1 A/New Caledonia/20/1999) following blocking with MEDI8852. Blue indicates self-blocking (block with CR9114, followed by binding of CR9114), while orange indicates competition (block with MEDI8852, followed by binding of CR9114); blue is almost entirely hidden behind orange. Green indicates absence of blocking (block with buffer, followed by binding of CR9114). CR9114 and MEDI8852 have overlapping epitopes, as determined by crystal structures; therefore, the observed competition is expected.
